# Supplementary material for: Disulfiram Suppresses Growth of the Malignant Pleural Mesothelioma Cells in Part by Inducing Apoptosis
Source: PLoS One. 2014 Apr 1;9(4):e93711. doi: 10.1371/journal.pone.0093711 (PMC3972204; doi:10.1371/journal.pone.0093711)
Supplement: Table S1 — List of DSF-Cu-regulated genes in H2373 MPM cells (XLSX). (XLS) [file pone.0093711.s002.xls]

## Sheet: Q7_DEList
ID	logFC	AveExpr	t	P.Value	adj.P.Val	B	FoldChange	Direction	SYMBOL	Name	ENTREZ
6270241	-3.55259	8.81972	-17.9206	8.76892e-15	1.67083e-10	18.9892	11.7338	DOWN	SOX8	SRY (sex determining region Y)-box 8	30812
3610601	-2.59566	8.88463	-12.1776	2.3113e-11	2.20197e-07	14.0243	6.04467	DOWN	CDKN1C	cyclin-dependent kinase inhibitor 1C (p57, Kip2)	1028
4830521	-1.28068	8.46388	-11.6861	5.16137e-11	3.27816e-07	13.4453	2.42954	DOWN	PNLDC1	poly(A)-specific ribonuclease (PARN)-like domain containing 1	154197
5810687	-2.63577	8.59695	-11.3549	8.99399e-11	3.97043e-07	13.0381	6.21506	DOWN	ARC	activity-regulated cytoskeleton-associated protein	23237
4010491	-0.898704	8.47022	-11.2684	1.04189e-10	3.97043e-07	12.9293	1.86439	DOWN	BTK	Bruton agammaglobulinemia tyrosine kinase	695
6350113	-2.12157	8.78983	-9.84695	1.31526e-09	4.17684e-06	10.9938	4.35168	DOWN	C13orf15	chromosome 13 open reading frame 15	28984
7320379	-0.6433	8.23946	-9.71307	1.69065e-09	4.60196e-06	10.7963	1.5619	DOWN	CILP	cartilage intermediate layer protein, nucleotide pyrophosphohydrolase	8483
2190739	-0.761265	8.23355	-9.55142	2.29607e-09	5.46866e-06	10.5542	1.69498	DOWN	GRINL1A	glutamate receptor, ionotropic, N-methyl D-aspartate-like 1A	81488
1990131	-1.94584	8.89768	-8.6585	1.32176e-08	2.71584e-05	9.14275	3.85263	DOWN	CACYBP	calcyclin binding protein	27101
6650224	-1.18784	8.40347	-8.62116	1.42534e-08	2.71584e-05	9.08092	2.27811	DOWN	PSPN	persephin	5623
6860041	-1.02352	8.29613	-8.54672	1.65755e-08	2.87117e-05	8.957	2.03288	DOWN	GCGR	glucagon receptor	2642
2140497	-0.728911	8.2252	-8.45612	1.99379e-08	3.1658e-05	8.80493	1.65739	DOWN	PROK2	prokineticin 2	60675
5550397	-0.686605	8.28136	-8.3397	2.53188e-08	3.71096e-05	8.60754	1.60949	DOWN	HIST3H3	histone cluster 3, H3	8290
4850228	-0.681381	8.28424	-8.11248	4.05706e-08	5.52166e-05	8.21581	1.60367	DOWN	FOXJ1	forkhead box J1	2302
7400753	-0.849991	8.38523	-7.69027	9.92327e-08	0.000126052	7.46504	1.80249	DOWN	RAI2	retinoic acid induced 2	10742
5690500	-3.48055	8.83201	-7.51355	1.45316e-07	0.000173053	7.14194	11.1622	DOWN	RGS2	regulator of G-protein signaling 2, 24kDa	5997
4480010	-0.628036	8.04129	-7.388	1.91031e-07	0.000214112	6.90923	1.54546	DOWN	HS3ST2	heparan sulfate (glucosamine) 3-O-sulfotransferase 2	9956
5390735	-0.574577	8.36203	-7.21719	2.78085e-07	0.000294368	6.58842	1.48924	DOWN	IGF2AS	insulin-like growth factor 2 antisense	51214
6180692	-4.7597	9.15957	-6.39073	1.80466e-06	0.00178176	4.96921	27.0903	DOWN	RASD1	RAS, dexamethasone-induced 1	51655
3870403	-1.24711	8.35502	-6.37532	1.87022e-06	0.00178176	4.93799	2.37365	DOWN	SLC16A10	solute carrier family 16, member 10 (aromatic amino acid transporter)	117247
2600458	-0.40833	8.19948	-5.78997	7.40136e-06	0.00642241	3.72697	1.32715	DOWN	CA7	carbonic anhydrase VII	766
1070564	-2.64724	8.78246	-5.76365	7.88048e-06	0.00642241	3.67142	6.26468	DOWN	MAFB	v-maf musculoaponeurotic fibrosarcoma oncogene homolog B (avian)	9935
6660114	-1.64229	12.4433	-5.75282	8.08667e-06	0.00642241	3.64853	3.12162	DOWN	FAM32A	family with sequence similarity 32, member A	26017
2470681	-1.05199	8.34157	-5.75267	8.08952e-06	0.00642241	3.64822	2.07339	DOWN	HSP90AA1	heat shock protein 90kDa alpha (cytosolic), class A member 1	3320
3710138	-1.01046	8.48371	-5.71879	8.77102e-06	0.00668492	3.57653	2.01455	DOWN	ZNF778	zinc finger protein 778	197320
770221	-6.15807	9.85781	-5.61307	1.12973e-05	0.0082792	3.3519	71.4107	DOWN	MT1G	metallothionein 1G	4495
2640609	-0.950228	8.30772	-5.49357	1.5058e-05	0.0106265	3.09641	1.93218	DOWN	S100P	S100 calcium binding protein P	6286
7650678	-2.50034	8.95122	-5.45736	1.64321e-05	0.0111821	3.01866	5.65817	DOWN	FAM46C	family with sequence similarity 46, member C	54855
4060209	-1.13129	8.22603	-5.3205	2.28806e-05	0.0150333	2.72355	2.19055	DOWN	CHGA	chromogranin A (parathyroid secretory protein 1)	1113
780255	-1.06545	8.77464	-5.25183	2.70305e-05	0.0167065	2.57474	2.09282	DOWN	HSPA1L	heat shock 70kDa protein 1-like	3305
6940594	-1.67025	8.71646	-5.24955	2.71807e-05	0.0167065	2.56979	3.18269	DOWN	FTCD	formiminotransferase cyclodeaminase	10841
4210010	-0.730294	8.36365	-5.19909	3.0729e-05	0.0182972	2.46015	1.65898	DOWN	C20orf195	chromosome 20 open reading frame 195	79025
6280253	-1.24161	9.5726	-5.18405	3.18751e-05	0.0184045	2.42741	2.36463	DOWN	SIRT1	sirtuin (silent mating type information regulation 2 homolog) 1 (S. cerevisiae)	23411
1110519	-0.975267	8.40866	-5.11846	3.73992e-05	0.0209589	2.28447	1.966	DOWN	RFTN2	raftlin family member 2	130132
1660056	-3.00075	9.50521	-5.06983	4.21128e-05	0.0229262	2.17822	8.00414	DOWN	SNAI1	snail homolog 1 (Drosophila)	6615
5130184	-0.409287	8.42803	-5.03352	4.60194e-05	0.024357	2.09878	1.32803	DOWN	MRPL10	mitochondrial ribosomal protein L10	124995
3850615	-1.06806	8.46532	-5.01628	4.80013e-05	0.0247194	2.06101	2.09662	DOWN	HSP90AA1	heat shock protein 90kDa alpha (cytosolic), class A member 1	3320
4200634	-0.978004	8.42202	-4.99369	5.07278e-05	0.025436	2.01152	1.96974	DOWN	RASL11B	RAS-like, family 11, member B	65997
2000494	-0.662226	8.37237	-4.96245	5.47591e-05	0.0267457	1.94298	1.58252	DOWN	JSRP1	junctional sarcoplasmic reticulum protein 1	126306
2360092	-3.83126	11.7709	-4.94756	5.67924e-05	0.0267457	1.9103	14.2339	DOWN	DNAJB1	DnaJ (Hsp40) homolog, subfamily B, member 1	3337
360554	-2.2536	8.88206	-4.93735	5.82319e-05	0.0267457	1.88786	4.7687	DOWN	HBA1	hemoglobin, alpha 1	3039
4200743	-0.461173	8.21674	-4.92522	5.9988e-05	0.0267457	1.86122	1.37666	DOWN	MT1B	metallothionein 1B	4490
2570682	-1.00826	8.51575	-4.92271	6.03583e-05	0.0267457	1.8557	2.01148	DOWN	ACRC	acidic repeat containing	93953
6520435	-2.06382	8.78392	-4.90497	6.30413e-05	0.0272997	1.81669	4.18093	DOWN	LOC387763	hypothetical LOC387763	387763
540451	-0.360319	8.23714	-4.87486	6.78714e-05	0.0287383	1.75047	1.28371	DOWN	TPSAB1	tryptase alpha/beta 1	7177
5670181	-1.77542	10.7937	-4.80661	8.02508e-05	0.0332413	1.60011	3.42337	DOWN	SUPT4H1	suppressor of Ty 4 homolog 1 (S. cerevisiae)	6827
3520750	-1.11515	8.51378	-4.72911	9.70893e-05	0.0386376	1.42906	2.16618	DOWN	HOXD1	homeobox D1	3231
3060670	-0.917593	8.46446	-4.72057	9.91488e-05	0.0386376	1.4102	1.88896	DOWN	FOXA3	forkhead box A3	3171
3390010	-0.503082	8.35465	-4.7197	9.9362e-05	0.0386376	1.40827	1.41724	DOWN	REP15	Rab15 effector protein	387849
7650086	-0.431819	8.30362	-4.68976	0.000106957	0.040759	1.3421	1.34893	DOWN	HIST1H3J	histone cluster 1, H3j	8356
1230603	-0.599215	8.24779	-4.66928	0.000112485	0.0415617	1.29681	1.51489	DOWN	RAB40A	RAB40A, member RAS oncogene family	142684
630471	-0.70156	8.15015	-4.6652	0.00011362	0.0415617	1.28778	1.62626	DOWN	PRSS8	protease, serine, 8	5652
870477	-0.48646	8.27668	-4.65816	0.000115607	0.0415617	1.2722	1.401	DOWN	MAP3K13	mitogen-activated protein kinase kinase kinase 13	9175
5670725	-1.15176	8.1716	-4.64665	0.000118926	0.0416375	1.24676	2.22185	DOWN	SPANXN1	SPANX family, member N1	494118
2940544	-2.66895	9.32472	-4.64237	0.000120188	0.0416375	1.23727	6.35967	DOWN	RRAD	Ras-related associated with diabetes	6236
1050671	-0.506818	8.29885	-4.60745	0.00013098	0.0445658	1.15997	1.42091	DOWN	GRASP	GRP1 (general receptor for phosphoinositides 1)-associated scaffold protein	160622
3450347	-0.569033	8.09231	-4.5681	0.000144311	0.047777	1.07282	1.48353	DOWN	ZKSCAN5	zinc finger with KRAB and SCAN domains 5	23660
5670343	-1.20282	8.6433	-4.56496	0.000145432	0.047777	1.06586	2.30189	DOWN	SKIL	SKI-like oncogene	6498
6040086	-2.5388	8.74295	-4.51805	0.000163253	0.0527223	0.961893	5.81103	DOWN	FOSB	FBJ murine osteosarcoma viral oncogene homolog B	2354
4920678	-0.34986	8.24522	-4.49819	0.000171441	0.054444	0.917868	1.27444	DOWN	AGXT	alanine-glyoxylate aminotransferase	189
1400682	-1.7194	8.42492	-4.4868	0.000176326	0.0550772	0.892595	3.29299	DOWN	MMP10	matrix metallopeptidase 10 (stromelysin 2)	4319
1820474	-0.597618	8.29152	-4.47418	0.000181898	0.0559012	0.864605	1.51322	DOWN	CCDC11	coiled-coil domain containing 11	220136
770484	-0.976408	9.0874	-4.41872	0.000208545	0.0630733	0.741589	1.96756	DOWN	CDK5R1	cyclin-dependent kinase 5, regulatory subunit 1 (p35)	8851
4220408	-0.536943	8.81913	-4.4052	0.000215616	0.064193	0.711582	1.4509	DOWN	SKI	v-ski sarcoma viral oncogene homolog (avian)	6497
4150639	-0.829042	8.37638	-4.38973	0.000224	0.0656631	0.67725	1.7765	DOWN	LOC100131484	hypothetical protein LOC100131484	100131484
6180044	-1.75629	8.8959	-4.35864	0.000241846	0.0697513	0.608257	3.37829	DOWN	DUSP2	dual specificity phosphatase 2	1844
6040634	-4.83495	9.13517	-4.34835	0.000248059	0.0697513	0.585428	28.5408	DOWN	HSPA6	heat shock 70kDa protein 6 (HSP70B')	3310
6560300	-0.431648	8.29054	-4.34693	0.000248929	0.0697513	0.582277	1.34877	DOWN	NAT5	N-acetyltransferase 5	51126
3890086	-0.328438	8.2639	-4.32438	0.000263165	0.0726716	0.532218	1.25565	DOWN	KRT75	keratin 75	9119
1010136	-6.70316	9.33728	-4.30594	0.000275407	0.0749657	0.491289	104.197	DOWN	HSPA6	heat shock 70kDa protein 6 (HSP70B')	3310
5130398	-0.567557	8.40679	-4.28948	0.000286808	0.0769696	0.454773	1.48201	DOWN	SIRT6	sirtuin (silent mating type information regulation 2 homolog) 6 (S. cerevisiae)	51548
870605	-0.558233	8.83454	-4.23823	0.000325431	0.0861218	0.34104	1.47246	DOWN	EED	embryonic ectoderm development	8726
5050327	-0.340921	8.27731	-4.22367	0.000337324	0.0880462	0.308727	1.26656	DOWN	LOR	loricrin	4014
3830221	-0.656888	8.08901	-4.19305	0.000363765	0.0936646	0.240791	1.57668	DOWN	SPANXN5	SPANX family, member N5	494197
130408	-0.340186	8.18182	-4.17635	0.000379041	0.0962965	0.203758	1.26592	DOWN	NRARP	Notch-regulated ankyrin repeat protein	441478
1780259	-1.62621	10.3055	-4.16803	0.000386887	0.0965544	0.185312	3.08701	DOWN	BCCIP	BRCA2 and CDKN1A interacting protein	56647
670242	0.534911	8.5619	4.16458	0.00039019	0.0965544	0.177659	1.44885	UP	NBPF3	neuroblastoma breakpoint family, member 3	84224
4730102	-1.08485	8.71472	-4.14618	0.00040828	0.0985858	0.136861	2.12116	DOWN	DHDH	dihydrodiol dehydrogenase (dimeric)	27294
6960427	-1.03365	8.89928	-4.14572	0.000408748	0.0985858	0.13583	2.0472	DOWN	ZNF408	zinc finger protein 408	79797
3450541	-2.25056	10.266	-4.13962	0.000414925	0.0988249	0.122326	4.75868	DOWN	CHORDC1	cysteine and histidine-rich domain (CHORD)-containing 1	26973
7320482	-1.14033	11.0736	-4.12508	0.000430058	0.0998955	0.0900786	2.20432	DOWN	ISY1	ISY1 splicing factor homolog (S. cerevisiae)	57461
2680561	-1.1182	11.1336	-4.12076	0.000434653	0.0998955	0.0805127	2.17076	DOWN	GCC1	GRIP and coiled-coil domain containing 1	79571
3420544	-0.963079	8.22578	-4.11814	0.000437467	0.0998955	0.0747024	1.94947	DOWN	LOC728419	similar to deubiquitinating enzyme 3	728419
4050019	-0.995881	9.50662	-4.11543	0.000440391	0.0998955	0.0687047	1.9943	DOWN	THAP1	THAP domain containing, apoptosis associated protein 1	55145
3290192	-1.31287	11.1926	-4.0307	0.000542472	0.116138	-0.118946	2.48435	DOWN	STX3	syntaxin 3	6809
2320520	-1.41295	9.74972	-3.93828	0.000680746	0.135278	-0.323265	2.66281	DOWN	TFIP11	tuftelin interacting protein 11	24144
2190554	-1.50983	9.20922	-3.91337	0.000723657	0.138991	-0.378258	2.84776	DOWN	UTP11L	UTP11-like, U3 small nucleolar ribonucleoprotein, (yeast)	51118
2690014	-1.93074	8.85327	-3.8735	0.000797971	0.146295	-0.466185	3.81252	DOWN	DLL1	delta-like 1 (Drosophila)	28514
460220	-1.38652	12.6954	-3.86713	0.000810524	0.147083	-0.480223	2.61448	DOWN	ATP6V1G1	ATPase, H+ transporting, lysosomal 13kDa, V1 subunit G1	9550
1450215	-1.44708	8.41868	-3.85541	0.000834133	0.14845	-0.506043	2.72656	DOWN	CCK	cholecystokinin	885
130008	-1.32087	11.2532	-3.85185	0.000841428	0.14845	-0.513873	2.49816	DOWN	TAF7	TAF7 RNA polymerase II, TATA box binding protein (TBP)-associated factor, 55kDa	6879
830593	-1.06694	9.04664	-3.82445	0.000899805	0.157293	-0.574186	2.09498	DOWN	ZNF77	zinc finger protein 77	58492
6580215	1.28434	11.3632	3.79397	0.000969472	0.158525	-0.641224	2.43571	UP	GRAMD1A	GRAM domain containing 1A	57655
7150332	-1.06487	10.101	-3.7936	0.000970344	0.158525	-0.642032	2.09198	DOWN	NME1-NME2	NME1-NME2	654364
6510437	-1.017	11.1174	-3.78429	0.000992677	0.158525	-0.662485	2.0237	DOWN	ISY1	ISY1 splicing factor homolog (S. cerevisiae)	57461
3440367	-1.88432	11.1864	-3.7805	0.00100192	0.158525	-0.670811	3.69178	DOWN	SNIP1	Smad nuclear interacting protein 1	79753
3710035	-4.06685	10.127	-3.77903	0.00100553	0.158525	-0.674047	16.7588	DOWN	HMOX1	heme oxygenase (decycling) 1	3162
630180	-1.13189	9.30881	-3.77501	0.00101544	0.158525	-0.682858	2.19145	DOWN	SYNJ1	synaptojanin 1	8867
2450204	-1.63022	10.1957	-3.77408	0.00101777	0.158525	-0.684917	3.0956	DOWN	CCDC49	coiled-coil domain containing 49	54883
2340392	-2.60156	10.7451	-3.77153	0.00102411	0.158525	-0.690502	6.06941	DOWN	GOSR2	golgi SNAP receptor complex member 2	9570
3290707	-1.41843	9.16926	-3.74191	0.00110094	0.163886	-0.755507	2.67295	DOWN	KLF10	Kruppel-like factor 10	7071
5860463	-1.24794	9.85715	-3.73813	0.00111115	0.164123	-0.763797	2.37502	DOWN	FAM103A1	family with sequence similarity 103, member A1	83640
2350239	-1.15998	10.8323	-3.69948	0.00122098	0.172763	-0.848462	2.23455	DOWN	MIDN	midnolin	90007
240382	-1.66383	9.79603	-3.69898	0.00122248	0.172763	-0.849564	3.16857	DOWN	tcag7.1239	similar to Huntingtin interacting protein K	643438
840433	-1.66732	9.50686	-3.68684	0.00125916	0.175125	-0.876119	3.17623	DOWN	TUBB4Q	tubulin, beta polypeptide 4, member Q	56604
4640379	-1.20565	9.866	-3.6612	0.00134027	0.183723	-0.932161	2.30641	DOWN	MTF1	metal-regulatory transcription factor 1	4520
70743	-1.25654	12.2491	-3.65259	0.00136865	0.186273	-0.950972	2.38923	DOWN	POP4	processing of precursor 4, ribonuclease P/MRP subunit (S. cerevisiae)	10775
1580309	-2.22455	11.3115	-3.59269	0.00158305	0.211064	-1.08155	4.67366	DOWN	NXF1	nuclear RNA export factor 1	10482
4670092	-2.85529	10.6681	-3.59244	0.00158403	0.211064	-1.08211	7.23651	DOWN	ID2	inhibitor of DNA binding 2, dominant negative helix-loop-helix protein	3398
6290368	-4.98548	9.91501	-3.5883	0.00160001	0.211256	-1.09111	31.6796	DOWN	CRYAB	crystallin, alpha B	1410
3710332	-1.25954	11.361	-3.57137	0.00166706	0.216083	-1.12793	2.39419	DOWN	RAB5C	RAB5C, member RAS oncogene family	5878
7330564	-1.65166	10.3562	-3.54139	0.00179268	0.227976	-1.19306	3.14195	DOWN	TPRKB	TP53RK binding protein	51002
5860300	-4.84341	12.1239	-3.5018	0.00197277	0.243728	-1.27883	28.7086	DOWN	HSPA1A	heat shock 70kDa protein 1A	3303
4780008	3.03539	13.4071	3.49848	0.00198866	0.243728	-1.28602	8.19869	UP	IGFBP7	insulin-like growth factor binding protein 7	3490
6900059	-1.5613	9.42478	-3.48113	0.00207373	0.250668	-1.32354	2.9512	DOWN	TUBB4Q	tubulin, beta polypeptide 4, member Q	56604
460187	-1.08599	8.50358	-3.45606	0.00220303	0.260129	-1.37769	2.12283	DOWN	IRF8	interferon regulatory factor 8	3394
7380605	-1.27777	10.7018	-3.45587	0.00220402	0.260129	-1.37809	2.42463	DOWN	GTF2B	general transcription factor IIB	2959
2900162	-1.85357	9.3977	-3.45443	0.00221166	0.260129	-1.38119	3.61394	DOWN	NXT2	nuclear transport factor 2-like export factor 2	55916
3990553	-1.35506	10.0255	-3.44452	0.0022651	0.26478	-1.40256	2.55808	DOWN	GATA2	GATA binding protein 2	2624
1300100	1.18174	11.312	3.43225	0.00233302	0.271057	-1.429	2.2685	UP	SLC25A37	solute carrier family 25, member 37	51312
3800170	-1.28896	9.20106	-3.42282	0.0023866	0.27333	-1.44931	2.44352	DOWN	WDSOF1	WD repeats and SOF1 domain containing	25879
3990176	-1.24173	11.6462	-3.42125	0.00239562	0.27333	-1.45269	2.36481	DOWN	PROSC	proline synthetase co-transcribed homolog (bacterial)	11212
2640519	2.22557	13.2982	3.36619	0.00273428	0.297708	-1.57092	4.67696	UP	COL4A1	collagen, type IV, alpha 1	1282
1050184	-2.04802	8.77055	-3.35151	0.00283221	0.306619	-1.60236	4.13537	DOWN	C5orf27	chromosome 5 open reading frame 27	202299
6590040	-1.37763	9.28302	-3.33108	0.00297417	0.316592	-1.64605	2.59841	DOWN	LOC731605	similar to Bcl-2-associated transcription factor 1 (Btf)	731605
5960215	-1.44858	9.52343	-3.30097	0.0031961	0.325466	-1.71029	2.72939	DOWN	KHDRBS3	KH domain containing, RNA binding, signal transduction associated 3	10656
4850356	-1.98708	9.2327	-3.28865	0.0032915	0.331832	-1.73654	3.96433	DOWN	ZNF187	zinc finger protein 187	7741
1030039	-2.29461	10.7691	-3.26417	0.00348926	0.344479	-1.78858	4.90622	DOWN	HIST2H2AA4	histone cluster 2, H2aa4	723790
5670139	-1.70312	10.6045	-3.25604	0.00355745	0.3494	-1.80584	3.25604	DOWN	IER5	immediate early response 5	51278
2100026	-1.03738	9.81776	-3.25022	0.00360707	0.352457	-1.81819	2.05249	DOWN	ZNF20	zinc finger protein 20	7568
1990706	-3.71892	12.4097	-3.24157	0.00368207	0.353997	-1.83653	13.1676	DOWN	MT1X	metallothionein 1X	4501
4280754	-1.05801	9.56299	-3.22407	0.00383842	0.353997	-1.87359	2.08206	DOWN	CXorf56	chromosome X open reading frame 56	63932
2030021	-1.42189	11.1064	-3.22241	0.00385352	0.353997	-1.87709	2.67936	DOWN	TMEM208	transmembrane protein 208	29100
7560446	1.1327	11.3663	3.22222	0.00385533	0.353997	-1.87751	2.19269	UP	ZNF217	zinc finger protein 217	7764
1410131	-1.6987	9.56476	-3.21703	0.00390305	0.353997	-1.88846	3.24607	DOWN	EAF1	ELL associated factor 1	85403
6980328	-1.1003	10.3288	-3.2106	0.0039631	0.354521	-1.90206	2.144	DOWN	SCNM1	sodium channel modifier 1	79005
2810270	-2.71398	10.8978	-3.16535	0.00441138	0.389141	-1.99744	6.56127	DOWN	GADD45B	growth arrest and DNA-damage-inducible, beta	4616
1010524	-1.19036	11.8731	-3.15428	0.00452839	0.39399	-2.02073	2.2821	DOWN	ZMAT2	zinc finger, matrin type 2	153527
6290296	-1.12284	9.88458	-3.14072	0.00467571	0.394538	-2.04919	2.17776	DOWN	CCDC94	coiled-coil domain containing 94	55702
870592	-1.30684	8.58808	-3.13923	0.0046921	0.394538	-2.0523	2.47399	DOWN	C7orf53	chromosome 7 open reading frame 53	286006
770661	1.00607	11.9791	3.12805	0.00481751	0.397371	-2.07575	2.00844	UP	RASA1	RAS p21 protein activator (GTPase activating protein) 1	5921
20615	-1.0832	10.1903	-3.11446	0.00497419	0.406774	-2.10418	2.11873	DOWN	TTF1	transcription termination factor, RNA polymerase I	7270
6200100	-1.2431	10.0631	-3.10858	0.00504354	0.407202	-2.11648	2.36707	DOWN	SPTY2D1	SPT2, Suppressor of Ty, domain containing 1 (S. cerevisiae)	144108
4670370	-1.17521	9.48722	-3.08305	0.00535548	0.42097	-2.16976	2.25825	DOWN	SLC7A6OS	solute carrier family 7, member 6 opposite strand	84138
1260681	1.43255	9.34272	3.08204	0.00536818	0.42097	-2.17187	2.69923	UP	DDX60	DEAD (Asp-Glu-Ala-Asp) box polypeptide 60	55601
5260450	-1.09521	9.04246	-3.08025	0.00539082	0.42097	-2.1756	2.13644	DOWN	C7orf64	chromosome 7 open reading frame 64	84060
3440411	-4.13879	12.8745	-3.07509	0.00545657	0.421063	-2.18636	17.6157	DOWN	HSPA1B	heat shock 70kDa protein 1B	3304
7150603	-3.38684	8.9936	-3.05578	0.00570925	0.431682	-2.22651	10.4602	DOWN	DNAJA4	DnaJ (Hsp40) homolog, subfamily A, member 4	55466
1660653	-2.41585	10.6004	-3.05106	0.00577274	0.434758	-2.23632	5.33634	DOWN	SERTAD1	SERTA domain containing 1	29950
290369	-1.32937	12.2368	-3.04186	0.00589843	0.442475	-2.25541	2.51293	DOWN	SF3B4	splicing factor 3b, subunit 4, 49kDa	10262
6650484	-1.29069	8.94704	-3.03434	0.00600299	0.445062	-2.27098	2.44644	DOWN	ASGR1	asialoglycoprotein receptor 1	432
3870440	-1.11002	8.57748	-3.03141	0.00604435	0.446392	-2.27707	2.15848	DOWN	FLCN	folliculin	201163
2030577	-1.89013	9.82253	-3.00517	0.0064261	0.465562	-2.33131	3.70669	DOWN	HES6	hairy and enhancer of split 6 (Drosophila)	55502
2070739	-1.26282	11.8917	-2.96847	0.00699928	0.481459	-2.40691	2.39964	DOWN	C1orf144	chromosome 1 open reading frame 144	26099
6400279	-1.1141	12.4449	-2.961	0.0071218	0.486376	-2.42225	2.1646	DOWN	ATP6V0D1	ATPase, H+ transporting, lysosomal 38kDa, V0 subunit d1	9114
4880709	-1.23966	8.99705	-2.94384	0.00741096	0.502521	-2.45742	2.36142	DOWN	C7orf61	chromosome 7 open reading frame 61	402573
5860075	-2.12193	11.1956	-2.93804	0.00751123	0.505721	-2.46929	4.35275	DOWN	HIST2H2AC	histone cluster 2, H2ac	8338
1500253	-1.32535	9.81111	-2.91839	0.0078608	0.523705	-2.50946	2.50594	DOWN	TXNL1	thioredoxin-like 1	9352
3940356	-1.61651	11.3685	-2.9014	0.00817536	0.53165	-2.54408	3.06633	DOWN	MAP2K1IP1	mitogen-activated protein kinase kinase 1 interacting protein 1	8649
6840048	-1.34773	9.82443	-2.87303	0.00872779	0.5481	-2.60172	2.54511	DOWN	USPL1	ubiquitin specific peptidase like 1	10208
4390364	-1.448	10.5546	-2.8698	0.00879285	0.549308	-2.60827	2.7283	DOWN	NRAS	neuroblastoma RAS viral (v-ras) oncogene homolog	4893
6110561	-1.06316	11.4431	-2.86332	0.00892493	0.552701	-2.6214	2.0895	DOWN	C12orf44	chromosome 12 open reading frame 44	60673
5550553	-1.23922	11.4412	-2.85963	0.00900084	0.553653	-2.62886	2.36071	DOWN	CRELD2	cysteine-rich with EGF-like domains 2	79174
4210414	-1.34584	11.7826	-2.84503	0.00930783	0.561074	-2.65838	2.54178	DOWN	LOC729009	hypothetical LOC729009	729009
1170379	-1.05198	9.71487	-2.84103	0.00939344	0.561074	-2.66644	2.07337	DOWN	ZNF35	zinc finger protein 35	7584
7150594	-2.04063	9.37348	-2.81786	0.00990542	0.584328	-2.71312	4.11426	DOWN	F12	coagulation factor XII (Hageman factor)	2161
3780707	-1.08551	11.2439	-2.81089	0.0100645	0.588118	-2.72713	2.12212	DOWN	LOC283951	hypothetical protein LOC283951	283951
6760603	-1.00125	10.5388	-2.80614	0.0101743	0.588118	-2.73666	2.00174	DOWN	MAD2L1BP	MAD2L1 binding protein	9587
4390112	-1.47735	10.7357	-2.79977	0.0103233	0.589062	-2.74944	2.78437	DOWN	SLU7	SLU7 splicing factor homolog (S. cerevisiae)	10569
1660139	-1.23101	10.5521	-2.76346	0.0112135	0.605959	-2.82203	2.34731	DOWN	VPS37B	vacuolar protein sorting 37 homolog B (S. cerevisiae)	79720
6130010	-1.02908	10.0619	-2.76037	0.0112925	0.605959	-2.82819	2.04073	DOWN	C2orf42	chromosome 2 open reading frame 42	54980
650039	-1.36097	10.3544	-2.75663	0.0113888	0.605959	-2.83564	2.56859	DOWN	ZMAT5	zinc finger, matrin type 5	55954
6420086	-1.07147	13.9545	-2.75531	0.0114231	0.605959	-2.83828	2.10157	DOWN	DNAJA1	DnaJ (Hsp40) homolog, subfamily A, member 1	3301
510307	-1.20253	10.6774	-2.75314	0.0114795	0.605959	-2.84259	2.30142	DOWN	C18orf19	chromosome 18 open reading frame 19	125228
3990091	-1.27813	9.13967	-2.74399	0.0117202	0.613507	-2.86078	2.42525	DOWN	ZNF34	zinc finger protein 34	80778
1230528	-2.37102	13.31	-2.72991	0.0121001	0.620918	-2.88872	5.17306	DOWN	HSPH1	heat shock 105kDa/110kDa protein 1	10808
1010201	-1.24027	13.1704	-2.71325	0.0125646	0.638415	-2.9217	2.36243	DOWN	ZNF622	zinc finger protein 622	90441
5570750	1.29178	10.2964	2.70588	0.0127755	0.645689	-2.93626	2.4483	UP	UNC84B	unc-84 homolog B (C. elegans)	25777
1690091	-1.05893	12.4197	-2.70318	0.0128536	0.647917	-2.94159	2.08339	DOWN	MRPL18	mitochondrial ribosomal protein L18	29074
840681	-1.08122	11.2756	-2.68411	0.013418	0.668957	-2.97915	2.11582	DOWN	GEMIN6	gem (nuclear organelle) associated protein 6	79833
540348	1.03069	11.6821	2.67743	0.0136211	0.671547	-2.99228	2.043	UP	C14orf135	chromosome 14 open reading frame 135	64430
6370605	-1.39849	10.7528	-2.66772	0.0139215	0.671547	-3.01133	2.63626	DOWN	HSP90AB1	heat shock protein 90kDa alpha (cytosolic), class B member 1	3326
1070181	-1.00666	11.4076	-2.6605	0.0141489	0.673985	-3.02547	2.00926	DOWN	SUMO2	SMT3 suppressor of mif two 3 homolog 2 (S. cerevisiae)	6613
4250379	-3.10169	9.41253	-2.64231	0.0147377	0.689519	-3.06104	8.58425	DOWN	FOS	v-fos FBJ murine osteosarcoma viral oncogene homolog	2353
6270204	-1.14699	10.6521	-2.63941	0.0148336	0.689519	-3.06669	2.21452	DOWN	ELOF1	elongation factor 1 homolog (S. cerevisiae)	84337
1170044	-1.03929	9.76927	-2.63669	0.0149241	0.689519	-3.072	2.05522	DOWN	SGTA	small glutamine-rich tetratricopeptide repeat (TPR)-containing, alpha	6449
1690189	-1.2417	14.3153	-2.63207	0.0150789	0.689519	-3.08099	2.36476	DOWN	HSPA8	heat shock 70kDa protein 8	3312
3140139	-1.65271	9.08095	-2.63163	0.0150939	0.689519	-3.08185	3.14424	DOWN	RGS16	regulator of G-protein signaling 16	6004
3440201	-1.36764	11.4911	-2.62507	0.0153166	0.693212	-3.09461	2.58048	DOWN	CRIPT	cysteine-rich PDZ-binding protein	9419
3290274	-1.00389	8.49543	-2.61489	0.0156686	0.696048	-3.1144	2.00539	DOWN	CST6	cystatin E/M	1474
2060441	1.11769	13.5964	2.61259	0.015749	0.696048	-3.11886	2.17	UP	GLG1	golgi apparatus protein 1	2734
20181	-1.26852	10.9717	-2.61225	0.0157611	0.696048	-3.11953	2.40915	DOWN	SBDS	Shwachman-Bodian-Diamond syndrome	51119
1660338	-1.10692	8.73584	-2.60857	0.015891	0.697666	-3.12667	2.15386	DOWN	TSPYL2	TSPY-like 2	64061
6200768	-1.14426	10.3259	-2.59966	0.0162093	0.704273	-3.14393	2.21033	DOWN	TICAM2	toll-like receptor adaptor molecule 2	353376
3830301	-1.04037	11.6976	-2.59822	0.0162613	0.704273	-3.14671	2.05676	DOWN	SNRPB2	small nuclear ribonucleoprotein polypeptide B''	6629
10296	1.3903	11.1051	2.59599	0.0163421	0.706081	-3.15102	2.62134	UP	CSNK1E	casein kinase 1, epsilon	1454
2120093	1.45877	12.8799	2.56234	0.0176092	0.72782	-3.21591	2.74874	UP	TRABD	TraB domain containing	80305
2850139	2.04958	11.6728	2.54299	0.0183787	0.738668	-3.25302	4.13986	UP	CRIM1	cysteine rich transmembrane BMP regulator 1 (chordin-like)	51232
160113	-1.02204	11.5425	-2.53924	0.0185316	0.738668	-3.2602	2.0308	DOWN	SEC61B	Sec61 beta subunit	10952
2970427	-1.16578	13.176	-2.52926	0.0189438	0.74138	-3.27926	2.24354	DOWN	MAGOH	mago-nashi homolog, proliferation-associated (Drosophila)	4116
1940711	-1.35274	10.0075	-2.52715	0.0190318	0.743097	-3.28328	2.55398	DOWN	UBFD1	ubiquitin family domain containing 1	56061
4210670	-1.15876	10.078	-2.51382	0.0195983	0.748564	-3.30868	2.23265	DOWN	UTP3	UTP3, small subunit (SSU) processome component, homolog (S. cerevisiae)	57050
4480193	-1.44504	9.72938	-2.513	0.0196339	0.748564	-3.31025	2.7227	DOWN	FAM46B	family with sequence similarity 46, member B	115572
2510441	1.00791	10.5575	2.50331	0.020056	0.748632	-3.32865	2.011	UP	TMEM42	transmembrane protein 42	131616
110152	-1.14422	13.2418	-2.49819	0.0202824	0.751869	-3.33836	2.21026	DOWN	EIF4A3	eukaryotic translation initiation factor 4A, isoform 3	9775
2760609	-1.25857	12.3845	-2.48484	0.0208846	0.762329	-3.36365	2.39259	DOWN	MAP1LC3B	microtubule-associated protein 1 light chain 3 beta	81631
2480181	1.08868	9.35852	2.47123	0.0215152	0.772628	-3.38935	2.12679	UP	TCEA2	transcription elongation factor A (SII), 2	6919
650075	-1.05303	9.97273	-2.45933	0.022081	0.777693	-3.41174	2.07488	DOWN	NUBP1	nucleotide binding protein 1 (MinD homolog, E. coli)	4682
430458	-1.07429	11.5862	-2.45281	0.022397	0.782789	-3.424	2.10569	DOWN	MRPL45	mitochondrial ribosomal protein L45	84311
1510523	-1.34441	11.7305	-2.44381	0.02284	0.789824	-3.44088	2.53927	DOWN	PTGES3	prostaglandin E synthase 3 (cytosolic)	10728
4830180	-3.4631	12.5645	-2.44176	0.0229418	0.791907	-3.44471	11.028	DOWN	ZFAND2A	zinc finger, AN1-type domain 2A	90637
7570110	1.61179	10.9109	2.43854	0.0231032	0.793309	-3.45075	3.05631	UP	APBB3	amyloid beta (A4) precursor protein-binding, family B, member 3	10307
6400097	1.17336	10.4892	2.42323	0.0238835	0.800345	-3.47935	2.25537	UP	GALNT10	UDP-N-acetyl-alpha-D-galactosamine:polypeptide N-acetylgalactosaminyltransferase 10 (GalNAc-T10)	55568
270292	-1.00147	11.1409	-2.42298	0.0238962	0.800345	-3.47981	2.00203	DOWN	CCNK	cyclin K	8812
6370209	-1.9541	10.7284	-2.42184	0.0239556	0.800345	-3.48194	3.87474	DOWN	MYLIP	myosin regulatory light chain interacting protein	29116
290370	-1.04554	12.5298	-2.41906	0.0241001	0.800345	-3.48712	2.06414	DOWN	CHMP1B	chromatin modifying protein 1B	57132
4810181	1.07671	12.586	2.4118	0.0244819	0.801508	-3.50064	2.10922	UP	NFKB1	nuclear factor of kappa light polypeptide gene enhancer in B-cells 1	4790
2030725	-1.03951	11.867	-2.39763	0.0252431	0.813843	-3.52695	2.05552	DOWN	SAR1B	SAR1 gene homolog B (S. cerevisiae)	51128
6520008	-1.64973	13.7892	-2.37387	0.0265691	0.832643	-3.57089	3.13775	DOWN	HSP90AA1	heat shock protein 90kDa alpha (cytosolic), class A member 1	3320
1190411	1.45012	12.278	2.36455	0.0271063	0.840764	-3.58805	2.7323	UP	MAN1B1	mannosidase, alpha, class 1B, member 1	11253
4480091	1.1267	10.3057	2.36251	0.0272251	0.840764	-3.5918	2.18359	UP	SPTBN1	spectrin, beta, non-erythrocytic 1	6711
2760484	1.19715	12.3757	2.35793	0.0274939	0.844951	-3.60021	2.29287	UP	DSE	dermatan sulfate epimerase	29940
380685	-1.56559	11.8066	-2.35536	0.0276455	0.845518	-3.60492	2.95998	DOWN	NOSIP	nitric oxide synthase interacting protein	51070
5080431	1.35657	11.9863	2.34654	0.0281729	0.84589	-3.6211	2.56076	UP	AADACL1	arylacetamide deacetylase-like 1	57552
1410326	-1.22312	9.6842	-2.34502	0.0282647	0.84589	-3.62388	2.33451	DOWN	GLRX2	glutaredoxin 2	51022
6290044	-1.80332	10.6793	-2.34469	0.0282847	0.84589	-3.62449	3.49021	DOWN	SHFM1	split hand/foot malformation (ectrodactyly) type 1	7979
1710471	1.06461	11.8807	2.34302	0.0283854	0.84589	-3.62753	2.09161	UP	SPTBN1	spectrin, beta, non-erythrocytic 1	6711
730544	-1.49357	10.2346	-2.34258	0.0284124	0.84589	-3.62834	2.81584	DOWN	SLC30A1	solute carrier family 30 (zinc transporter), member 1	7779
1500181	-1.02758	11.7008	-2.3374	0.0287284	0.847567	-3.63781	2.0386	DOWN	NOL12	nucleolar protein 12	79159
580121	-1.34005	12.2139	-2.33598	0.028816	0.847567	-3.64041	2.5316	DOWN	LOC729009	hypothetical LOC729009	729009
4010551	-1.28017	8.88756	-2.33575	0.0288301	0.847567	-3.64083	2.42868	DOWN	ATXN1L	ataxin 1-like	342371
4480370	1.3713	12.6983	2.33095	0.0291269	0.852509	-3.64958	2.58704	UP	RHBDF1	rhomboid 5 homolog 1 (Drosophila)	64285
6370730	-1.0747	12.3885	-2.3271	0.0293674	0.855605	-3.65661	2.10628	DOWN	CLTA	clathrin, light chain (Lca)	1211
630091	-1.6406	9.00827	-2.31559	0.0300967	0.867777	-3.67757	3.11795	DOWN	HIST1H2BG	histone cluster 1, H2bg	8339
780168	1.26905	11.0146	2.31405	0.0301955	0.8691	-3.68036	2.41002	UP	MPPE1	metallophosphoesterase 1	65258
1500594	1.05358	12.8416	2.305	0.0307818	0.872747	-3.69678	2.07567	UP	IFNGR2	interferon gamma receptor 2 (interferon gamma transducer 1)	3460
1990446	1.28886	9.07275	2.30102	0.0310433	0.873677	-3.70399	2.44335	UP	CCL5	chemokine (C-C motif) ligand 5	6352
7160201	1.08167	10.1366	2.29979	0.0311241	0.873677	-3.70621	2.11649	UP	LOC100129563	similar to MSTP146	100129563
1090296	-1.0648	10.6545	-2.29932	0.0311551	0.873677	-3.70706	2.09188	DOWN	GRWD1	glutamate-rich WD repeat containing 1	83743
6940524	1.19271	9.37266	2.29817	0.0312314	0.873838	-3.70914	2.28582	UP	PDE5A	phosphodiesterase 5A, cGMP-specific	8654
520280	-1.29469	10.7971	-2.29654	0.0313397	0.875147	-3.71209	2.45324	DOWN	NGDN	neuroguidin, EIF4E binding protein	25983
4010397	1.11994	11.8907	2.28351	0.0322168	0.88339	-3.73561	2.17339	UP	ZAK	sterile alpha motif and leucine zipper containing kinase AZK	51776
2320524	1.0321	12.4757	2.28314	0.0322423	0.88339	-3.73629	2.045	UP	ULK1	unc-51-like kinase 1 (C. elegans)	8408
7000608	-2.15896	11.2513	-2.28002	0.0324554	0.885967	-3.7419	4.46593	DOWN	RPS7	ribosomal protein S7	6201
5290403	1.16169	10.12	2.27668	0.0326857	0.888856	-3.74792	2.23719	UP	ZHX3	zinc fingers and homeoboxes 3	23051
5700110	1.50393	9.43024	2.25679	0.0340864	0.904572	-3.7836	2.83614	UP	PCK2	phosphoenolpyruvate carboxykinase 2 (mitochondrial)	5106
7610343	-1.06462	9.43418	-2.24768	0.0347457	0.906825	-3.79988	2.09162	DOWN	C6orf173	chromosome 6 open reading frame 173	387103
6350414	-1.06753	12.1232	-2.246	0.0348687	0.906825	-3.80287	2.09584	DOWN	CIDECP	cell death-inducing DFFA-like effector c pseudogene	152302
6350332	-1.00461	10.3373	-2.24411	0.0350077	0.907532	-3.80625	2.0064	DOWN	CLP1	CLP1, cleavage and polyadenylation factor I subunit, homolog (S. cerevisiae)	10978
1440435	-1.03343	9.99486	-2.23791	0.0354664	0.912004	-3.8173	2.04689	DOWN	CDKN2AIP	CDKN2A interacting protein	55602
5080181	-1.08775	10.5212	-2.23734	0.0355089	0.912004	-3.81832	2.12542	DOWN	WDR20	WD repeat domain 20	91833
3170497	-1.03615	8.74677	-2.23694	0.0355389	0.912004	-3.81903	2.05075	DOWN	CRABP2	cellular retinoic acid binding protein 2	1382
1850431	-1.21464	10.2106	-2.22284	0.0366043	0.917707	-3.84408	2.32083	DOWN	hCG_1789710	protein (peptidylprolyl cis/trans isomerase) NIMA-interacting, 4 (parvulin) pseudogene	728758
5050075	-1.15869	12.3461	-2.21263	0.037394	0.9262	-3.86215	2.23255	DOWN	LOC729009	hypothetical LOC729009	729009
5360403	-1.08274	9.57222	-2.19717	0.0386192	0.936771	-3.88943	2.11805	DOWN	PIP4K2A	phosphatidylinositol-5-phosphate 4-kinase, type II, alpha	5305
1030551	1.01414	10.9471	2.19627	0.0386914	0.936771	-3.89101	2.0197	UP	LEMD2	LEM domain containing 2	221496
7100102	1.22534	11.6659	2.18899	0.039282	0.936771	-3.90381	2.33811	UP	PIGQ	phosphatidylinositol glycan anchor biosynthesis, class Q	9091
4120348	-1.15828	10.7094	-2.18536	0.0395797	0.936782	-3.91019	2.23191	DOWN	FRG1	FSHD region gene 1	2483
1450541	-1.4225	10.0925	-2.18353	0.0397305	0.936782	-3.9134	2.68049	DOWN	PHLDA2	pleckstrin homology-like domain, family A, member 2	7262
6220377	-1.02191	12.1304	-2.18265	0.0398031	0.936782	-3.91494	2.0306	DOWN	SFRS10	splicing factor, arginine/serine-rich 10 (transformer 2 homolog, Drosophila)	6434
6660196	-1.05008	9.97614	-2.18214	0.0398451	0.936782	-3.91583	2.07064	DOWN	ZNF143	zinc finger protein 143	7702
7330228	-2.23053	10.4697	-2.18011	0.0400136	0.936782	-3.91939	4.69307	DOWN	TUBB2A	tubulin, beta 2A	7280
2450373	1.06171	12.2229	2.17714	0.0402603	0.936782	-3.92458	2.0874	UP	GPSM1	G-protein signaling modulator 1 (AGS3-like, C. elegans)	26086
5700088	1.27037	12.8774	2.17696	0.0402757	0.936782	-3.9249	2.41223	UP	NCSTN	nicastrin	23385
5890692	1.52544	13.7991	2.16781	0.0410467	0.936782	-3.9409	2.87874	UP	ITGB5	integrin, beta 5	3693
5050017	-1.35342	9.3677	-2.16302	0.0414557	0.936782	-3.94926	2.55518	DOWN	TSPYL2	TSPY-like 2	64061
4060220	1.03139	12.0808	2.16265	0.0414869	0.936782	-3.94989	2.04399	UP	ITGAV	integrin, alpha V (vitronectin receptor, alpha polypeptide, antigen CD51)	3685
6840750	-1.61718	10.9958	-2.15676	0.0419956	0.937552	-3.96016	3.06774	DOWN	AXUD1	AXIN1 up-regulated 1	64651
2100301	-1.56768	9.63022	-2.15496	0.0421521	0.937552	-3.96329	2.96428	DOWN	INSIG1	insulin induced gene 1	3638
7380274	1.14973	11.3801	2.15364	0.0422671	0.937552	-3.96559	2.21872	UP	LOC100130633	similar to ZMYM6 protein	100130633
6380088	1.06169	12.605	2.15142	0.0424605	0.939199	-3.96943	2.08738	UP	ADCY3	adenylate cyclase 3	109
5960154	1.01184	12.3787	2.14514	0.0430139	0.939411	-3.98033	2.01648	UP	SPIRE1	spire homolog 1 (Drosophila)	56907
4050040	-1.07079	9.17844	-2.13112	0.0442734	0.947592	-4.00459	2.10059	DOWN	LMTK2	lemur tyrosine kinase 2	22853
3390678	1.88736	11.7566	2.12878	0.0444867	0.947592	-4.00863	3.69959	UP	NFE2L3	nuclear factor (erythroid-derived 2)-like 3	9603
2900138	-1.25953	8.70714	-2.1262	0.0447229	0.947887	-4.01308	2.39417	DOWN	CALCB	calcitonin-related polypeptide beta	797
2850500	1.20163	9.04761	2.12204	0.0451071	0.949427	-4.02026	2.3	UP	GBP4	guanylate binding protein 4	115361
2710414	-2.47844	9.78989	-2.12163	0.0451444	0.949427	-4.02096	5.57294	DOWN	MT1F	metallothionein 1F	4494
4290376	-1.14276	9.70987	-2.11757	0.0455221	0.949986	-4.02795	2.20803	DOWN	RHOB	ras homolog gene family, member B	388
5890707	1.56991	13.5776	2.10756	0.0464646	0.956087	-4.04514	2.96886	UP	ITGB1	integrin, beta 1 (fibronectin receptor, beta polypeptide, antigen CD29 includes MDF2, MSK12)	3688
3060438	-1.59044	8.68836	-2.10615	0.046599	0.957817	-4.04756	3.0114	DOWN	CA2	carbonic anhydrase II	760
5360082	-1.88522	9.572	-2.10295	0.0469044	0.960486	-4.05303	3.6941	DOWN	CSRP2	cysteine and glycine-rich protein 2	1466
2940280	-1.06168	11.1844	-2.10055	0.0471349	0.961573	-4.05714	2.08736	DOWN	POLR2C	polymerase (RNA) II (DNA directed) polypeptide C, 33kDa	5432
2750376	-1.27092	10.4773	-2.09578	0.047596	0.966839	-4.06529	2.41316	DOWN	PDRG1	p53 and DNA damage regulated 1	81572
4260092	1.06347	11.7756	2.08351	0.0488007	0.977753	-4.08621	2.08995	UP	KLHL5	kelch-like 5 (Drosophila)	51088
1470369	-1.87054	9.27103	-2.08094	0.0490571	0.978039	-4.09059	3.6567	DOWN	CCL26	chemokine (C-C motif) ligand 26	10344
940397	1.19708	13.7669	2.07106	0.0500513	0.979679	-4.10736	2.29275	UP	IGF2R	insulin-like growth factor 2 receptor	3482
5220242	-1.03401	10.6245	-2.07075	0.0500826	0.979679	-4.10788	2.04771	DOWN	RBM18	RNA binding motif protein 18	92400
3990192	-1.16744	11.9398	-2.07018	0.0501414	0.979679	-4.10886	2.24613	DOWN	AHSA1	AHA1, activator of heat shock 90kDa protein ATPase homolog 1 (yeast)	10598
5310255	-1.30108	9.8122	-2.06952	0.0502078	0.979679	-4.10996	2.46413	DOWN	C3orf52	chromosome 3 open reading frame 52	79669
4070504	-1.25884	9.1634	-2.06765	0.0503987	0.979894	-4.11313	2.39304	DOWN	TAF13	TAF13 RNA polymerase II, TATA box binding protein (TBP)-associated factor, 18kDa	6884
580347	-1.02847	11.3201	-2.06666	0.0505003	0.980869	-4.11481	2.03986	DOWN	MAP2K3	mitogen-activated protein kinase kinase 3	5606
770333	-1.09547	10.1487	-2.06339	0.0508361	0.983201	-4.12034	2.13683	DOWN	UQCRH	ubiquinol-cytochrome c reductase hinge protein	7388
4120133	1.19452	11.7528	2.06298	0.0508781	0.983201	-4.12103	2.28869	UP	SPATA20	spermatogenesis associated 20	64847
6560482	1.12891	12.6268	2.04847	0.0523941	0.987666	-4.14552	2.18694	UP	CIRBP	cold inducible RNA binding protein	1153
2120639	-1.26632	11.4474	-2.04533	0.0527268	0.987854	-4.15079	2.40547	DOWN	LOC441377	similar to ribosomal protein S26	441377
7150196	1.08081	8.66331	2.04216	0.0530653	0.987854	-4.15612	2.11522	UP	OASL	2'-5'-oligoadenylate synthetase-like	8638
2850156	-2.26794	12.6593	-2.03582	0.053748	0.987927	-4.16676	4.81635	DOWN	TUBB3	tubulin, beta 3	10381
3120735	1.04881	9.5382	2.02976	0.0544078	0.987927	-4.17691	2.06883	UP	LTB4R	leukotriene B4 receptor	1241
2570356	1.20706	11.556	2.02869	0.0545241	0.987927	-4.17868	2.30866	UP	RHBDF2	rhomboid 5 homolog 2 (Drosophila)	79651
6520170	-1.43806	11.7451	-2.02839	0.054558	0.987927	-4.1792	2.70957	DOWN	DEDD2	death effector domain containing 2	162989
1850551	1.20758	8.89041	2.02779	0.0546233	0.987927	-4.1802	2.30951	UP	ITGA11	integrin, alpha 11	22801
160240	-1.07854	13.2255	-2.0242	0.0550189	0.987927	-4.18619	2.1119	DOWN	DDX39	DEAD (Asp-Glu-Ala-Asp) box polypeptide 39	10212
2070451	1.37744	13.2465	2.02019	0.0554635	0.987927	-4.19288	2.59806	UP	CD97	CD97 molecule	976
2760064	-1.08258	9.16247	-2.01981	0.0555063	0.987927	-4.19352	2.11782	DOWN	DNAJC3	DnaJ (Hsp40) homolog, subfamily C, member 3	5611
3870634	1.06729	12.1294	2.01281	0.0562913	0.989936	-4.20518	2.09549	UP	XYLT2	xylosyltransferase II	64132
1260072	1.10214	10.5615	2.01178	0.0564076	0.989936	-4.20689	2.14673	UP	ACAD11	acyl-Coenzyme A dehydrogenase family, member 11	84129
3190477	-1.02643	11.5322	-2.00844	0.0567859	0.989936	-4.21244	2.03698	DOWN	MAP2K3	mitogen-activated protein kinase kinase 3	5606
6200332	1.41867	11.3187	2.00795	0.0568417	0.989936	-4.21325	2.67339	UP	AFAP1	actin filament associated protein 1	60312
990750	-1.034	10.6135	-2.00227	0.0574907	0.989936	-4.22267	2.04769	DOWN	RYBP	RING1 and YY1 binding protein	23429
5130767	1.03299	12.1147	1.99989	0.0577656	0.989936	-4.22662	2.04626	UP	SMAD3	SMAD family member 3	4088
1780632	1.597	10.63	1.98914	0.0590176	0.990768	-4.24438	3.02513	UP	IFIT1	interferon-induced protein with tetratricopeptide repeats 1	3434
2470168	1.26295	13.7715	1.98771	0.0591862	0.991883	-4.24674	2.39986	UP	LAMC1	laminin, gamma 1 (formerly LAMB2)	3915
2970296	1.64376	14.6224	1.9835	0.059685	0.995766	-4.25369	3.12479	UP	FSTL1	follistatin-like 1	11167
4290136	-1.24492	11.1619	-1.98049	0.0600434	0.99631	-4.25864	2.37005	DOWN	HIST1H2BK	histone cluster 1, H2bk	85236
2570180	1.01078	9.1425	1.97953	0.0601575	0.99631	-4.26021	2.01501	UP	H6PD	hexose-6-phosphate dehydrogenase (glucose 1-dehydrogenase)	9563
4780376	1.05905	13.8665	1.97638	0.0605361	0.998462	-4.26539	2.08356	UP	CDH2	cadherin 2, type 1, N-cadherin (neuronal)	1000
3190239	2.59422	11.9959	1.96525	0.0618878	0.99999	-4.28363	6.03864	UP	CLDN1	claudin 1	9076
6770646	-1.30742	11.1528	-1.95564	0.0630764	0.99999	-4.29933	2.47499	DOWN	COMMD9	COMM domain containing 9	29099
1940528	-1.5687	9.12593	-1.95347	0.0633478	0.99999	-4.30287	2.96637	DOWN	VGF	VGF nerve growth factor inducible	7425
6770348	1.14685	12.8104	1.9433	0.0646332	0.99999	-4.31942	2.2143	UP	CKAP4	cytoskeleton-associated protein 4	10970
3420731	-1.02902	10.9967	-1.94254	0.0647306	0.99999	-4.32065	2.04064	DOWN	LOC643949	hypothetical LOC643949	643949
1110528	-1.11314	8.49915	-1.94228	0.0647629	0.99999	-4.32107	2.16316	DOWN	MT3	metallothionein 3	4504
2120343	1.39542	10.5664	1.93187	0.0661045	0.99999	-4.33793	2.63066	UP	SCARF2	scavenger receptor class F, member 2	91179
2970739	1.23405	12.6107	1.92842	0.0665547	0.99999	-4.34351	2.35227	UP	SLC7A1	solute carrier family 7 (cationic amino acid transporter, y+ system), member 1	6541
4850242	1.12492	10.9377	1.9206	0.0675844	0.99999	-4.35612	2.1809	UP	ITGB5	integrin, beta 5	3693
3420327	-1.12413	10.4627	-1.91945	0.0677366	0.99999	-4.35797	2.1797	DOWN	C2orf49	chromosome 2 open reading frame 49	79074
1010762	1.00549	11.3569	1.91492	0.068341	0.99999	-4.36526	2.00763	UP	CCDC92	coiled-coil domain containing 92	80212
1170113	1.16782	11.9008	1.90315	0.0699331	0.99999	-4.38414	2.24672	UP	PLXNB2	plexin B2	23654
2490747	1.44045	14.032	1.90033	0.0703198	0.99999	-4.38865	2.71405	UP	AARS	alanyl-tRNA synthetase	16
6860687	-1.22066	10.3694	-1.89717	0.0707543	0.99999	-4.3937	2.33054	DOWN	UQCRB	ubiquinol-cytochrome c reductase binding protein	7381
6650520	-1.36818	8.61121	-1.89712	0.0707605	0.99999	-4.39377	2.58145	DOWN	NEFH	neurofilament, heavy polypeptide 200kDa	4744
4900577	-1.03742	10.9209	-1.8971	0.0707643	0.99999	-4.39381	2.05255	DOWN	RPL38	ribosomal protein L38	6169
4120707	-1.0412	12.4121	-1.89449	0.071125	0.99999	-4.39797	2.05794	DOWN	RPL23	ribosomal protein L23	9349
770095	1.53928	10.156	1.88264	0.072785	0.99999	-4.41683	2.90648	UP	GRAMD3	GRAM domain containing 3	65983
380731	-1.26704	10.1877	-1.86423	0.0754308	0.99999	-4.44597	2.40668	DOWN	TUBA4A	tubulin, alpha 4a	7277
730129	-1.0519	10.6592	-1.86296	0.0756162	0.99999	-4.44797	2.07326	DOWN	PTMA	prothymosin, alpha	5757
6290669	-1.10035	11.4947	-1.86149	0.0758317	0.99999	-4.45029	2.14406	DOWN	DYNLL2	dynein, light chain, LC8-type 2	140735
3370167	1.5838	9.75641	1.85991	0.0760632	0.99999	-4.45277	2.99759	UP	TNFRSF6B	tumor necrosis factor receptor superfamily, member 6b, decoy	8771
4830048	-1.25853	10.1717	-1.85917	0.0761715	0.99999	-4.45393	2.39251	DOWN	SAP18	Sin3A-associated protein, 18kDa	10284
4220097	1.26317	11.6043	1.85576	0.0766753	0.99999	-4.4593	2.40022	UP	TCEA2	transcription elongation factor A (SII), 2	6919
6370035	1.71425	9.62185	1.84487	0.0783019	0.99999	-4.47637	3.28125	UP	OASL	2'-5'-oligoadenylate synthetase-like	8638
5810471	1.51112	11.4696	1.84104	0.0788812	0.99999	-4.48236	2.85031	UP	DRAM	damage-regulated autophagy modulator	55332
4810110	-1.59279	10.0943	-1.83931	0.0791448	0.99999	-4.48507	3.01631	DOWN	EGR1	early growth response 1	1958
7550451	1.19325	11.0403	1.8356	0.0797114	0.99999	-4.49087	2.28668	UP	NPEPL1	aminopeptidase-like 1	79716
2970634	1.2131	13.2464	1.8352	0.0797715	0.99999	-4.49148	2.31836	UP	MACF1	microtubule-actin crosslinking factor 1	23499
5670050	1.05328	12.9245	1.81848	0.0823701	0.99999	-4.51747	2.07524	UP	LOC100128279	similar to ZDHHC8 protein	100128279
1340170	1.01828	12.2703	1.81786	0.0824673	0.99999	-4.51842	2.02551	UP	RFTN1	raftlin, lipid raft linker 1	23180
7550082	1.26926	10.4905	1.81349	0.0831588	0.99999	-4.52518	2.41038	UP	ADAM9	ADAM metallopeptidase domain 9 (meltrin gamma)	8754
4590356	-1.87278	12.832	-1.81172	0.083441	0.99999	-4.52792	3.66237	DOWN	TUBB2A	tubulin, beta 2A	7280
6620711	1.16993	8.68368	1.80874	0.0839176	0.99999	-4.53253	2.25001	UP	RSAD2	radical S-adenosyl methionine domain containing 2	91543
460048	-1.03058	12.1168	-1.78362	0.0880232	0.99999	-4.57109	2.04285	DOWN	CCDC59	coiled-coil domain containing 59	29080
1980259	-1.52809	10.7095	-1.77489	0.0894899	0.99999	-4.5844	2.88404	DOWN	BRF2	BRF2, subunit of RNA polymerase III transcription initiation factor, BRF1-like	55290
6290593	1.00158	9.23787	1.77308	0.0897974	0.99999	-4.58715	2.0022	UP	GPR1	G protein-coupled receptor 1	2825
5960164	1.07608	10.8771	1.77015	0.0902954	0.99999	-4.5916	2.1083	UP	KLHL22	kelch-like 22 (Drosophila)	84861
1440576	-1.0744	9.37956	-1.76922	0.0904534	0.99999	-4.59301	2.10584	DOWN	SNF1LK	SNF1-like kinase	150094
2940050	1.11706	10.1319	1.76839	0.0905949	0.99999	-4.59427	2.16905	UP	CROP	cisplatin resistance-associated overexpressed protein	51747
2230131	1.80865	10.5639	1.76508	0.0911636	0.99999	-4.59929	3.50315	UP	PTX3	pentraxin-related gene, rapidly induced by IL-1 beta	5806
6960707	1.06865	10.8489	1.75549	0.0928243	0.99999	-4.61379	2.09747	UP	CCPG1	cell cycle progression 1	9236
2260445	-1.55967	12.7859	-1.74996	0.0937943	0.99999	-4.62213	2.94786	DOWN	BAG3	BCL2-associated athanogene 3	9531
6560154	1.20729	12.7382	1.74237	0.0951397	0.99999	-4.63354	2.30903	UP	ITGA3	integrin, alpha 3 (antigen CD49C, alpha 3 subunit of VLA-3 receptor)	3675
3990201	1.0282	10.5558	1.74085	0.0954117	0.99999	-4.63582	2.03947	UP	NAT14	N-acetyltransferase 14	57106
1710327	1.13547	10.902	1.73979	0.095601	0.99999	-4.63741	2.1969	UP	BBS2	Bardet-Biedl syndrome 2	583
3180593	-1.17169	10.0507	-1.73496	0.0964691	0.99999	-4.64464	2.25275	DOWN	TMEM167A	transmembrane protein 167A	153339
4040494	1.33807	11.098	1.73485	0.0964903	0.99999	-4.64482	2.52813	UP	HNRNPA2B1	heterogeneous nuclear ribonucleoprotein A2/B1	3181
5220451	1.31673	8.84019	1.73483	0.0964942	0.99999	-4.64485	2.49101	UP	POSTN	periostin, osteoblast specific factor	10631
2450368	-1.24214	9.46428	-1.72916	0.097522	0.99999	-4.65332	2.36548	DOWN	GEM	GTP binding protein overexpressed in skeletal muscle	2669
3850338	1.04097	10.6947	1.72768	0.097791	0.99999	-4.65552	2.05762	UP	TMEM175	transmembrane protein 175	84286
6860670	-1.63033	9.45056	-1.71594	0.099955	0.99999	-4.67299	3.09583	DOWN	USMG5	up-regulated during skeletal muscle growth 5 homolog (mouse)	84833
150082	1.22131	12.7739	1.7107	0.100935	0.99999	-4.68076	2.33158	UP	SLC44A1	solute carrier family 44, member 1	23446
4150164	1.24127	11.4737	1.7011	0.102748	0.99999	-4.69493	2.36407	UP	GPT2	glutamic pyruvate transaminase (alanine aminotransferase) 2	84706
7330349	-1.39553	10.6972	-1.69713	0.103507	0.99999	-4.70078	2.63085	DOWN	CCDC58	coiled-coil domain containing 58	131076
1240253	1.63457	12.3553	1.69476	0.103961	0.99999	-4.70426	3.10494	UP	NCOA7	nuclear receptor coactivator 7	135112
1710332	-1.02488	11.7711	-1.6925	0.104397	0.99999	-4.70758	2.03478	DOWN	TCP1	t-complex 1	6950
4810465	1.11079	12.3939	1.69193	0.104507	0.99999	-4.70843	2.15963	UP	SPG7	spastic paraplegia 7 (pure and complicated autosomal recessive)	6687
4810615	1.13088	12.6314	1.68857	0.105158	0.99999	-4.71335	2.18993	UP	KIAA0746	KIAA0746 protein	23231
4060202	-1.11053	11.1291	-1.6883	0.10521	0.99999	-4.71374	2.15925	DOWN	MAPRE2	microtubule-associated protein, RP/EB family, member 2	10982
4390561	-1.10574	10.0118	-1.67532	0.107758	0.99999	-4.73271	2.15209	DOWN	HSPA4	heat shock 70kDa protein 4	3308
6350017	1.62078	11.281	1.67422	0.107976	0.99999	-4.73432	3.07542	UP	CNTNAP1	contactin associated protein 1	8506
2680291	-1.2799	9.06286	-1.66024	0.110783	0.99999	-4.75462	2.42822	DOWN	HRK	harakiri, BCL2 interacting protein (contains only BH3 domain)	8739
2140156	1.07221	12.7101	1.6544	0.111974	0.99999	-4.76305	2.10265	UP	CD46	CD46 molecule, complement regulatory protein	4179
6180142	1.01854	11.565	1.64675	0.113549	0.99999	-4.77407	2.02586	UP	TMEM44	transmembrane protein 44	93109
2940722	1.64403	9.9108	1.64495	0.113923	0.99999	-4.77666	3.12538	UP	CDK5RAP3	CDK5 regulatory subunit associated protein 3	80279
1470220	1.11964	11.0846	1.64219	0.114498	0.99999	-4.78062	2.17293	UP	TTC13	tetratricopeptide repeat domain 13	79573
7160102	-1.48514	10.2078	-1.63322	0.116384	0.99999	-4.79347	2.79944	DOWN	SLFN11	schlafen family member 11	91607
6180192	-1.1122	12.1378	-1.63254	0.116527	0.99999	-4.79444	2.16175	DOWN	PSMC4	proteasome (prosome, macropain) 26S subunit, ATPase, 4	5704
1780377	-2.16681	8.16612	-1.62927	0.11722	0.99999	-4.7991	4.49028	DOWN	RAC1	ras-related C3 botulinum toxin substrate 1 (rho family, small GTP binding protein Rac1)	5879
360187	-1.17802	10.3195	-1.62417	0.11831	0.99999	-4.80637	2.26266	DOWN	DPH3	DPH3, KTI11 homolog (S. cerevisiae)	285381
4200021	-1.18314	10.1824	-1.62188	0.118802	0.99999	-4.80962	2.2707	DOWN	ZBTB43	zinc finger and BTB domain containing 43	23099
6400021	-1.11125	13.9461	-1.61915	0.119391	0.99999	-4.81351	2.16033	DOWN	HSPB1	heat shock 27kDa protein 1	3315
1410408	1.19433	11.7081	1.61302	0.120723	0.99999	-4.8222	2.28838	UP	ANO6	anoctamin 6	196527
2690452	1.38886	10.5762	1.60899	0.121604	0.99999	-4.82789	2.61872	UP	IFIT3	interferon-induced protein with tetratricopeptide repeats 3	3437
540100	1.00017	10.6471	1.60822	0.121773	0.99999	-4.82898	2.00023	UP	ADARB1	adenosine deaminase, RNA-specific, B1 (RED1 homolog rat)	104
830639	-1.12227	9.78314	-1.59652	0.124367	0.99999	-4.84545	2.17689	DOWN	HBEGF	heparin-binding EGF-like growth factor	1839
1340465	-1.03066	10.1552	-1.59531	0.124638	0.99999	-4.84715	2.04296	DOWN	SMOX	spermine oxidase	54498
110725	1.54319	11.6463	1.59406	0.124917	0.99999	-4.8489	2.91438	UP	APCDD1L	adenomatosis polyposis coli down-regulated 1-like	164284
1400753	-1.18901	12.1694	-1.59328	0.125092	0.99999	-4.84999	2.27997	DOWN	DNAJB6	DnaJ (Hsp40) homolog, subfamily B, member 6	10049
3850370	1.21409	11.6415	1.59228	0.125317	0.99999	-4.85139	2.31995	UP	PNMA2	paraneoplastic antigen MA2	10687
2690537	1.36208	14.1859	1.59017	0.125794	0.99999	-4.85436	2.57055	UP	LOC730410	similar to HLA class I histocompatibility antigen, B-18 alpha chain precursor (MHC class I antigen B*18)	730410
4050523	1.06364	12.4396	1.58914	0.126027	0.99999	-4.8558	2.0902	UP	SLC44A2	solute carrier family 44, member 2	57153
5570685	-1.17774	10.4442	-1.58828	0.12622	0.99999	-4.85699	2.26223	DOWN	RRAGD	Ras-related GTP binding D	58528
2710711	1.02993	9.51622	1.58462	0.127052	0.99999	-4.86211	2.04193	UP	NSUN5C	NOL1/NOP2/Sun domain family, member 5C	260294
6860392	1.17364	12.3192	1.58397	0.1272	0.99999	-4.86302	2.2558	UP	ETS1	v-ets erythroblastosis virus E26 oncogene homolog 1 (avian)	2113
6900204	-1.13322	10.9689	-1.57838	0.128477	0.99999	-4.87079	2.19348	DOWN	ZFP36	zinc finger protein 36, C3H type, homolog (mouse)	7538
160563	1.16234	10.8934	1.55818	0.133189	0.99999	-4.89876	2.23821	UP	VEGFC	vascular endothelial growth factor C	7424
2630609	-1.7616	9.37945	-1.55548	0.133831	0.99999	-4.90248	3.39073	DOWN	ANGPTL4	angiopoietin-like 4	51129
6450008	1.17218	13.0111	1.54939	0.135284	0.99999	-4.91085	2.25353	UP	TMEM43	transmembrane protein 43	79188
1240326	1.10427	12.6973	1.54541	0.136241	0.99999	-4.91629	2.1499	UP	LIMCH1	LIM and calponin homology domains 1	22998
4290600	-1.06204	9.41676	-1.54402	0.136575	0.99999	-4.91819	2.08788	DOWN	CSE1L	CSE1 chromosome segregation 1-like (yeast)	1434
3400356	1.0144	10.1141	1.54067	0.137388	0.99999	-4.92277	2.02006	UP	KCNG1	potassium voltage-gated channel, subfamily G, member 1	3755
430021	1.2833	9.6227	1.53084	0.139792	0.99999	-4.93615	2.43394	UP	IFIT3	interferon-induced protein with tetratricopeptide repeats 3	3437
6840039	1.01235	13.7226	1.52883	0.140288	0.99999	-4.93888	2.0172	UP	VCL	vinculin	7414
270017	-1.53116	9.10179	-1.52729	0.140669	0.99999	-4.94097	2.89019	DOWN	DEFB103B	defensin, beta 103B	414325
6350608	1.35676	9.8187	1.52588	0.141019	0.99999	-4.94288	2.56109	UP	MYLK	myosin light chain kinase	4638
2060241	1.27737	11.1968	1.52077	0.142291	0.99999	-4.94979	2.42397	UP	CD47	CD47 molecule	961
5290215	-1.39558	10.8467	-1.51566	0.143572	0.99999	-4.95668	2.63094	DOWN	HSPB8	heat shock 22kDa protein 8	26353
5420035	1.23541	12.3902	1.51114	0.144713	0.99999	-4.96276	2.35448	UP	UNC84A	unc-84 homolog A (C. elegans)	23353
3460358	1.25679	11.486	1.50737	0.145673	0.99999	-4.96783	2.38963	UP	ITFG3	integrin alpha FG-GAP repeat containing 3	83986
2690019	1.08972	10.9001	1.5003	0.147483	0.99999	-4.97729	2.12833	UP	SNORA70	small nucleolar RNA, H/ACA box 70	26778
5870739	-1.98011	10.5411	-1.49788	0.148107	0.99999	-4.98052	3.94524	DOWN	MT1L	metallothionein 1L (gene/pseudogene)	4500
1710376	1.47253	11.5451	1.48938	0.150316	0.99999	-4.99184	2.77508	UP	TANC1	tetratricopeptide repeat, ankyrin repeat and coiled-coil containing 1	85461
6200095	1.12247	13.1056	1.48474	0.151532	0.99999	-4.99799	2.17719	UP	COL5A1	collagen, type V, alpha 1	1289
2510270	1.07407	9.12378	1.48263	0.152088	0.99999	-5.00079	2.10536	UP	CDC42EP5	CDC42 effector protein (Rho GTPase binding) 5	148170
6760059	1.00108	11.4781	1.48112	0.152486	0.99999	-5.00278	2.0015	UP	LOC100133914	hypothetical protein LOC100133914	100133914
6330017	1.00432	11.0343	1.47563	0.153944	0.99999	-5.01003	2.006	UP	SC65	synaptonemal complex protein SC65	10609
5810239	-1.02197	11.5747	-1.46653	0.156386	0.99999	-5.022	2.03069	DOWN	C8orf59	chromosome 8 open reading frame 59	401466
2100379	-1.12594	10.7911	-1.46451	0.156931	0.99999	-5.02465	2.18244	DOWN	PPP1R3C	protein phosphatase 1, regulatory (inhibitor) subunit 3C	5507
7330082	1.40839	10.6935	1.46224	0.157546	0.99999	-5.02762	2.65441	UP	HLA-F	major histocompatibility complex, class I, F	3134
6290097	-1.56903	13.4267	-1.4592	0.158373	0.99999	-5.03159	2.96706	DOWN	SAT1	spermidine/spermine N1-acetyltransferase 1	6303
2850291	1.06534	11.1527	1.45865	0.158524	0.99999	-5.03231	2.09266	UP	OSMR	oncostatin M receptor	9180
1820041	-1.74418	9.33424	-1.44454	0.162412	0.99999	-5.05066	3.35005	DOWN	NPTX2	neuronal pentraxin II	4885
4480484	1.0173	9.46723	1.42613	0.167601	0.99999	-5.07439	2.02412	UP	PDLIM5	PDZ and LIM domain 5	10611
1090678	-1.28392	14.5984	-1.40979	0.172317	0.99999	-5.09524	2.43501	DOWN	MT1A	metallothionein 1A	4489
6130754	-1.10512	8.98182	-1.39716	0.176035	0.99999	-5.11122	2.15117	DOWN	CXCR4	chemokine (C-X-C motif) receptor 4	7852
6650020	-1.78183	13.0002	-1.39689	0.176116	0.99999	-5.11156	3.43863	DOWN	ADM	adrenomedullin	133
5870243	-1.00269	9.74527	-1.38863	0.178582	0.99999	-5.12195	2.00373	DOWN	ELL2	elongation factor, RNA polymerase II, 2	22936
150703	-1.67828	11.2159	-1.37551	0.182556	0.99999	-5.13833	3.20046	DOWN	ATF3	activating transcription factor 3	467
5820072	-1.21167	13.0911	-1.37385	0.183063	0.99999	-5.14039	2.31605	DOWN	PPP1R15A	protein phosphatase 1, regulatory (inhibitor) subunit 15A	23645
630450	1.7654	10.8799	1.36852	0.184701	0.99999	-5.14701	3.39969	UP	IFIT2	interferon-induced protein with tetratricopeptide repeats 2	3433
5050309	-2.93397	12.3348	-1.36628	0.185393	0.99999	-5.14978	7.64212	DOWN	SNAR-A1	small ILF3/NF90-associated RNA A1	100126798
5820035	-1.01516	9.02732	-1.34827	0.191031	0.99999	-5.17195	2.02113	DOWN	LMCD1	LIM and cysteine-rich domains 1	29995
4250373	-1.09266	11.3655	-1.34274	0.192786	0.99999	-5.17869	2.13267	DOWN	LOC652826	similar to 26S protease regulatory subunit 6B (MIP224) (MB67-interacting protein) (TAT-binding protein 7) (TBP-7)	652826
4220110	-1.05487	8.95893	-1.34246	0.192876	0.99999	-5.17903	2.07753	DOWN	HES1	hairy and enhancer of split 1, (Drosophila)	3280
4120088	1.02655	7.87137	1.33947	0.193833	0.99999	-5.18268	2.03715	UP	SSX3	synovial sarcoma, X breakpoint 3	10214
7320709	-1.13844	12.6448	-1.33776	0.194381	0.99999	-5.18476	2.20143	DOWN	LOC100132291	similar to hCG2027326	100132291
3370202	1.3509	9.74859	1.33038	0.196761	0.99999	-5.19371	2.55071	UP	EDIL3	EGF-like repeats and discoidin I-like domains 3	10085
7400255	1.05294	10.2956	1.32577	0.19826	0.99999	-5.19928	2.07475	UP	PHLDB2	pleckstrin homology-like domain, family B, member 2	90102
6960273	1.16532	8.96188	1.31851	0.200638	0.99999	-5.20801	2.24283	UP	VCAN	versican	1462
510128	-1.31616	10.9482	-1.30697	0.204464	0.99999	-5.22182	2.49002	DOWN	DUSP5	dual specificity phosphatase 5	1847
7380646	-1.34506	11.4518	-1.30265	0.205909	0.99999	-5.22695	2.54041	DOWN	DDIT3	DNA-damage-inducible transcript 3	1649
2060156	1.19957	11.9231	1.29813	0.207432	0.99999	-5.23232	2.29671	UP	SH3PXD2A	SH3 and PX domains 2A	9644
6290348	1.22785	9.65234	1.2954	0.208356	0.99999	-5.23555	2.34217	UP	RGS11	regulator of G-protein signaling 11	8786
160446	1.27232	9.7339	1.28988	0.210234	0.99999	-5.24207	2.4155	UP	BTN3A2	butyrophilin, subfamily 3, member A2	11118
6650168	1.03306	10.1212	1.28535	0.211784	0.99999	-5.24741	2.04636	UP	RNF207	ring finger protein 207	388591
2710102	1.04474	11.037	1.27677	0.214744	0.99999	-5.25745	2.063	UP	LRP8	low density lipoprotein receptor-related protein 8, apolipoprotein e receptor	7804
3370291	1.00834	10.1994	1.26926	0.21736	0.99999	-5.2662	2.0116	UP	CYP2R1	cytochrome P450, family 2, subfamily R, polypeptide 1	120227
3360280	1.20988	10.7424	1.26809	0.217771	0.99999	-5.26756	2.31319	UP	SREBF1	sterol regulatory element binding transcription factor 1	6720
2650307	1.1257	10.7193	1.26636	0.218376	0.99999	-5.26957	2.18208	UP	BDNF	brain-derived neurotrophic factor	627
6060224	-1.17128	10.4117	-1.24906	0.224523	0.99999	-5.28953	2.25211	DOWN	CRISPLD2	cysteine-rich secretory protein LCCL domain containing 2	83716
6130154	-1.02478	11.7549	-1.23368	0.230092	0.99999	-5.30706	2.03465	DOWN	NP	nucleoside phosphorylase	4860
6520605	1.31671	9.59849	1.21536	0.236867	0.99999	-5.32771	2.49097	UP	PIK3IP1	phosphoinositide-3-kinase interacting protein 1	113791
7550706	-1.02486	10.7647	-1.21152	0.238305	0.99999	-5.332	2.03476	DOWN	PPIA	peptidylprolyl isomerase A (cyclophilin A)	5478
4920577	1.02519	10.3048	1.20831	0.239514	0.99999	-5.33558	2.03523	UP	BTN3A2	butyrophilin, subfamily 3, member A2	11118
2100040	-1.46238	8.20631	-1.18857	0.247041	0.99999	-5.35741	2.75562	DOWN	DEFB103B	defensin, beta 103B	414325
1780528	-1.97771	8.49207	-1.1865	0.247841	0.99999	-5.35968	3.93867	DOWN	TAP2	transporter 2, ATP-binding cassette, sub-family B (MDR/TAP)	6891
5570189	1.4217	10.991	1.1755	0.252121	0.99999	-5.37169	2.67901	UP	EFEMP1	EGF-containing fibulin-like extracellular matrix protein 1	2202
1500451	1.19393	10.1058	1.16886	0.254735	0.99999	-5.3789	2.28775	UP	JAG2	jagged 2	3714
6650278	-1.36769	9.74002	-1.16299	0.257058	0.99999	-5.38523	2.58057	DOWN	MAOA	monoamine oxidase A	4128
7210167	1.16192	10.6581	1.15891	0.258682	0.99999	-5.38962	2.23755	UP	APP	amyloid beta (A4) precursor protein	351
5290475	-1.00351	10.8004	-1.14541	0.264114	0.99999	-5.40405	2.00488	DOWN	RPS15	ribosomal protein S15	6209
1070403	1.32706	12.067	1.14412	0.264638	0.99999	-5.40542	2.5089	UP	GAS6	growth arrest-specific 6	2621
840537	1.04966	10.4316	1.13657	0.267717	0.99999	-5.41341	2.07005	UP	PDGFRB	platelet-derived growth factor receptor, beta polypeptide	5159
4230619	1.14703	10.7724	1.1364	0.267785	0.99999	-5.41359	2.21457	UP	ASMTL	acetylserotonin O-methyltransferase-like	8623
3460309	-1.60935	8.18257	-1.12937	0.270677	0.99999	-5.42099	3.05113	DOWN	LIPT1	lipoyltransferase 1	51601
2710368	1.06883	12.3293	1.116	0.276235	0.99999	-5.43495	2.09773	UP	CALD1	caldesmon 1	800
4220364	1.22956	10.226	1.11379	0.277162	0.99999	-5.43724	2.34496	UP	C1R	complement component 1, r subcomponent	715
3990259	-1.08308	9.50736	-1.11001	0.278755	0.99999	-5.44116	2.11855	DOWN	PPP2R2B	protein phosphatase 2 (formerly 2A), regulatory subunit B, beta isoform	5521
1450703	1.0519	9.39498	1.10986	0.278815	0.99999	-5.44131	2.07326	UP	SLC6A9	solute carrier family 6 (neurotransmitter transporter, glycine), member 9	6536
4070600	1.07079	10.5826	1.10538	0.280709	0.99999	-5.44593	2.10059	UP	NT5E	5'-nucleotidase, ecto (CD73)	4907
1510008	1.00225	12.3162	1.10293	0.281752	0.99999	-5.44846	2.00312	UP	TAPBP	TAP binding protein (tapasin)	6892
510400	-1.19604	10.0598	-1.08857	0.287901	0.99999	-5.46313	2.2911	DOWN	FKBP1A	FK506 binding protein 1A, 12kDa	2280
4570377	1.23404	9.57032	1.08607	0.288984	0.99999	-5.46567	2.35225	UP	ABCG1	ATP-binding cassette, sub-family G (WHITE), member 1	9619
4040600	1.01473	11.9982	1.08606	0.288986	0.99999	-5.46567	2.02053	UP	DAG1	dystroglycan 1 (dystrophin-associated glycoprotein 1)	1605
3310253	1.35144	12.1987	1.07587	0.29342	0.99999	-5.47596	2.55167	UP	ASNS	asparagine synthetase	440
290672	1.01518	11.4414	1.07567	0.293508	0.99999	-5.47616	2.02115	UP	PLOD2	procollagen-lysine, 2-oxoglutarate 5-dioxygenase 2	5352
2970767	-1.82983	9.67331	-1.07262	0.294846	0.99999	-5.47922	3.55496	DOWN	MMP3	matrix metallopeptidase 3 (stromelysin 1, progelatinase)	4314
5050095	1.00516	11.7271	1.06775	0.296993	0.99999	-5.4841	2.00717	UP	ACSS2	acyl-CoA synthetase short-chain family member 2	55902
10307	1.17057	11.2481	1.06664	0.297482	0.99999	-5.48521	2.25101	UP	CCL2	chemokine (C-C motif) ligand 2	6347
6110088	1.06499	11.7599	1.0654	0.298029	0.99999	-5.48644	2.09215	UP	ABCA1	ATP-binding cassette, sub-family A (ABC1), member 1	19
7160465	-1.33862	9.16895	-1.05156	0.304201	0.99999	-5.50016	2.52909	DOWN	DHRS2	dehydrogenase/reductase (SDR family) member 2	10202
6590309	1.04235	10.0672	1.03534	0.311546	0.99999	-5.51602	2.05959	UP	ABCA3	ATP-binding cassette, sub-family A (ABC1), member 3	21
1690521	1.05232	11.9923	1.02973	0.314114	0.99999	-5.52145	2.07386	UP	RRAS	related RAS viral (r-ras) oncogene homolog	6237
7050703	1.30108	8.99595	1.02393	0.316787	0.99999	-5.52705	2.46414	UP	SULF1	sulfatase 1	23213
7400162	1.29673	10.4061	1.02109	0.3181	0.99999	-5.52977	2.45671	UP	KIAA1199	KIAA1199	57214
20220	1.06061	12.6651	1.01662	0.320176	0.99999	-5.53405	2.08582	UP	DKK3	dickkopf homolog 3 (Xenopus laevis)	27122
6290064	1.0455	12.1873	1.01479	0.321028	0.99999	-5.5358	2.06408	UP	DFNA5	deafness, autosomal dominant 5	1687
7150296	1.11553	10.4699	1.01334	0.321703	0.99999	-5.53717	2.16674	UP	C1R	complement component 1, r subcomponent	715
940551	1.11324	11.45	0.981062	0.337026	0.99999	-5.56748	2.16331	UP	PSAT1	phosphoserine aminotransferase 1	29968
5340246	1.07998	13.0086	0.967626	0.34355	0.99999	-5.57982	2.11401	UP	CD9	CD9 molecule	928
3440369	1.00372	12.5815	0.965172	0.34475	0.99999	-5.58206	2.00517	UP	C8orf55	chromosome 8 open reading frame 55	51337
7330022	1.1062	11.8169	0.961537	0.346534	0.99999	-5.58537	2.15278	UP	GAS6	growth arrest-specific 6	2621
7200156	1.04183	11.2508	0.958263	0.348146	0.99999	-5.58834	2.05884	UP	MFSD3	major facilitator superfamily domain containing 3	113655
6270156	1.3632	11.6683	0.956832	0.348852	0.99999	-5.58963	2.57256	UP	COL12A1	collagen, type XII, alpha 1	1303
3840170	1.00924	11.4723	0.953717	0.350393	0.99999	-5.59244	2.01285	UP	DHRS3	dehydrogenase/reductase (SDR family) member 3	9249
2480577	1.12153	10.5477	0.952445	0.351023	0.99999	-5.59359	2.17577	UP	FAM84B	family with sequence similarity 84, member B	157638
2630110	1.05181	10.9465	0.941972	0.356243	0.99999	-5.60297	2.07313	UP	MX1	myxovirus (influenza virus) resistance 1, interferon-inducible protein p78 (mouse)	4599
5960386	1.45871	11.5885	0.940162	0.35715	0.99999	-5.60458	2.74863	UP	LEPREL2	leprecan-like 2	10536
270138	1.11488	11.3852	0.933704	0.3604	0.99999	-5.6103	2.16577	UP	C1S	complement component 1, s subcomponent	716
2900113	1.30864	11.223	0.923129	0.365764	0.99999	-5.6196	2.47708	UP	PLSCR4	phospholipid scramblase 4	57088
5820689	1.39248	12.3844	0.919354	0.367692	0.99999	-5.6229	2.6253	UP	EFEMP1	EGF-containing fibulin-like extracellular matrix protein 1	2202
5900671	1.28947	11.1077	0.915951	0.369436	0.99999	-5.62586	2.44438	UP	FAM129A	family with sequence similarity 129, member A	116496
2640634	1.01418	8.70839	0.904913	0.375129	0.99999	-5.63539	2.01975	UP	HTR2B	5-hydroxytryptamine (serotonin) receptor 2B	3357
5220072	1.12098	11.2206	0.895456	0.380053	0.99999	-5.64347	2.17495	UP	CFB	complement factor B	629
5260193	1.9529	11.5973	0.881187	0.387561	0.99999	-5.65551	3.87151	UP	PSG5	pregnancy specific beta-1-glycoprotein 5	5673
6380403	-1.43126	10.983	-0.879762	0.388317	0.99999	-5.6567	2.69682	DOWN	NPPB	natriuretic peptide precursor B	4879
4920671	-1.25338	10.3233	-0.879174	0.388629	0.99999	-5.65719	2.38399	DOWN	ADAMTS1	ADAM metallopeptidase with thrombospondin type 1 motif, 1	9510
3400292	1.88119	11.5903	0.866746	0.395259	0.99999	-5.66751	3.68379	UP	PSG11	pregnancy specific beta-1-glycoprotein 11	5680
3870615	1.69349	12.2065	0.86671	0.395278	0.99999	-5.66754	3.23439	UP	STC2	stanniocalcin 2	8614
3440500	1.3326	10.7295	0.85613	0.400979	0.99999	-5.67622	2.51856	UP	IL6	interleukin 6 (interferon, beta 2)	3569
1470176	-1.38725	10.225	-0.848331	0.405216	0.99999	-5.68256	2.6158	DOWN	TUBB2B	tubulin, beta 2B	347733
2450608	1.19196	9.70559	0.836585	0.41165	0.99999	-5.69199	2.28463	UP	COL3A1	collagen, type III, alpha 1	1281
4390634	1.08143	12.2585	0.826182	0.417403	0.99999	-5.70025	2.11614	UP	TNS3	tensin 3	64759
3990682	-1.77528	9.33198	-0.803998	0.429837	0.99999	-5.71752	3.42306	DOWN	RP13-36C9.3	cancer/testis antigen CT45-3	441519
2030576	1.12841	10.6821	0.783205	0.441698	0.99999	-5.73332	2.18617	UP	CDH11	cadherin 11, type 2, OB-cadherin (osteoblast)	1009
2760121	1.08473	9.03407	0.772357	0.447965	0.99999	-5.7414	2.12097	UP	COL1A2	collagen, type I, alpha 2	1278
430338	1.21158	10.1972	0.724418	0.476298	0.99999	-5.77585	2.31591	UP	ACTA2	actin, alpha 2, smooth muscle, aorta	59
270403	-1.01531	10.1989	-0.72324	0.477007	0.99999	-5.77667	2.02134	DOWN	RPL29	ribosomal protein L29	6159
460402	1.06516	11.5477	0.690271	0.497104	0.99999	-5.7991	2.09241	UP	NRP1	neuropilin 1	8829
1050465	1.25766	10.686	0.68822	0.498371	0.99999	-5.80046	2.39108	UP	PSG9	pregnancy specific beta-1-glycoprotein 9	5678
10259	-1.27705	9.10569	-0.660179	0.515861	0.99999	-5.8187	2.42344	DOWN	RP13-36C9.3	cancer/testis antigen CT45-3	441519
2810196	1.05178	11.2755	0.656253	0.518338	0.99999	-5.8212	2.07309	UP	LOC653879	similar to Complement C3 precursor	653879
6590338	1.12962	9.67209	0.646628	0.524435	0.99999	-5.82726	2.18802	UP	IL1A	interleukin 1, alpha	3552
6650161	1.28868	10.2537	0.646396	0.524582	0.99999	-5.8274	2.44304	UP	IL1B	interleukin 1, beta	3553
